# Supplementary material for: HOTAIR Long Non-coding RNA: Characterizing the Locus Features by the In Silico Approaches
Source: PubMed Central journal article supplement — Genomics Inform. 2017 Dec 29;15(4):170–7. doi: 10.5808/GI.2017.15.4.170 (PMC5769859; doi:10.5808/gi.2017.15.4.170), 2017-12-29
Supplement: gi-15-4-170-suppl1.pdf [file gi-15-4-170-suppl1.pdf]

**Supplementary Table 1.** The positions of regulatory sequences in the *HOTAIR* locus

| Position          | Promoter (active)                                                                                                                                                  | CpGIs                                                                                                                                                                                                                                                                                                      | Tandem repeat (strand+)                                                                                                                                                                         | CTCF              | Enhancer                                                                                                                                                                                                                    | DNase I hypersensitivity                                                                                                                                                                         | Module and TSSs                                                                                                                                                                                                                 |
|-------------------|--------------------------------------------------------------------------------------------------------------------------------------------------------------------|------------------------------------------------------------------------------------------------------------------------------------------------------------------------------------------------------------------------------------------------------------------------------------------------------------|-------------------------------------------------------------------------------------------------------------------------------------------------------------------------------------------------|-------------------|-----------------------------------------------------------------------------------------------------------------------------------------------------------------------------------------------------------------------------|--------------------------------------------------------------------------------------------------------------------------------------------------------------------------------------------------|---------------------------------------------------------------------------------------------------------------------------------------------------------------------------------------------------------------------------------|
| 54354858–54356533 | No                                                                                                                                                                 | No                                                                                                                                                                                                                                                                                                         | No                                                                                                                                                                                              | No                | No                                                                                                                                                                                                                          | No                                                                                                                                                                                               | <b>025604:</b><br>54355865–54356303<br><b>TSS:</b><br><b>(chr12.11801):</b><br>54354858–54354859                                                                                                                                |
| 54356534–54359334 | <b>HSMC cells:</b><br>54359134–54359334                                                                                                                            | <b>Bonafide1432:</b><br>54357217–54357921<br><b>CpG3 (CpGProD):</b><br>54357032–54358001<br><b>CpG2 (CpGProD):</b><br>54359256–54359334                                                                                                                                                                    | <b>(AAGGGG)n:</b><br>54358177–54358291                                                                                                                                                          | No                | <b>HSMC cells:</b><br>12 Weak enhancers<br><b>HMEC cells:</b><br>20 Weak enhancers                                                                                                                                          | <b>8:</b> 54358245–54358454<br><b>HSMC cells DNase I hotspot: 66574:</b><br>54357302–54358901                                                                                                    | <b>025605:</b><br>54358063–54358978                                                                                                                                                                                             |
| 54359335–54362492 | <b>HSMC cells:</b><br>54359335–54361533<br><br><b>NHEK cells:</b><br>54362134–54362333<br><br><b>Second active promoter based on Ensembl:</b><br>54359491–54362492 | <b>CpG18:</b><br>54359659–54359906<br><b>Bonafide1433:</b><br>54359598–54360005<br><b>CpG2.5 (WE):</b><br>54360184–54360883<br><b>CpG25:</b><br>54360375–54360660<br><b>Bonafide1434:</b><br>54360202–54360827<br><b>Bonafide1435:</b><br>54362119–54362323<br><b>CPG2 (CpGProD):</b><br>54359334–54360945 | <b>(AAAG)n:</b><br>54359478–54359704<br><br><b>(TCCCTCTC)n:</b><br>54359986–54360112                                                                                                            | 54361413–54361642 | <b>HMEC cells:</b><br>19 Weak enhancers                                                                                                                                                                                     | <b>19:</b> 54359645–54359854<br><b>16:</b> 54361465–54361654<br><br><b>HSMC cells DNase I hotspot: 66575:</b><br>54359619–54360710<br><b>66576:</b><br>54361172–54361793                         | <b>025606:</b><br>54359632–54360527<br><br><b>025607:</b><br>54361760–54362456<br><br><b>TSS:</b><br><b>CHR12-M0409-R1:</b><br>54361133–54361133                                                                                |
| 54362493–54363334 | No                                                                                                                                                                 | <b>Bona fide 1436:</b><br>54362691–54362900                                                                                                                                                                                                                                                                | No                                                                                                                                                                                              | No                | <b>HSMC cells:</b><br>6 Weak enhancers                                                                                                                                                                                      | No                                                                                                                                                                                               | <b>025608:</b><br>54362765–54363139                                                                                                                                                                                             |
| 54363335–54364965 | No                                                                                                                                                                 | No                                                                                                                                                                                                                                                                                                         | <b>L2C (within strand-):</b><br>54363655–54363707                                                                                                                                               | No                | <b>HSMC cells:</b><br>7 Weak enhancers                                                                                                                                                                                      | No                                                                                                                                                                                               | <b>025609:</b><br>54364519–54364965                                                                                                                                                                                             |
| 54364966–54370999 | <b>HSMC cells:</b><br>54365934–54370733<br><br><b>NHEK cells:</b><br>54367139–54369133<br><b>First active promoter based on Ensembl:</b><br>54365691–54370092      | <b>Bona fide 1437:</b><br>54366623–54367999<br><b>CpG2 (WE):</b><br>54366684–54366909<br><b>CpG165:</b><br>54366816–54369103<br><b>CpG1 (CpGProD):</b><br>54366456–54368740<br><b>CpG2.4 (WE):</b><br>54368334–54368964<br><b>Bona fide 1438:</b><br>54368166–54369840                                     | <b>(ACCCC)n:</b><br>54366647–54366670<br><br><b>(GGCGGA)n:</b><br>54367601–54367637<br><br><b>(GGGA)n:</b><br>54367731–54367801<br><br><b>GAGGGAGGGAGC</b><br><b>GAGA:</b><br>54367742–54367783 | 54366799–54367314 | <b>HEpG2 cells:</b><br>6 Weak enhancers<br><b>HMEC cells:</b><br>13 Weak enhancers<br><b>HSMC cells:</b><br>20 Weak enhancers<br><b>NHEK cells:</b><br>7 Weak enhancers,<br><b>4 Strong enhancers:</b><br>54365934–54367133 | <b>31:</b> 54366145–54366374<br><b>41:</b> 54366785–54367814<br><b>HSMC cells DNase I hotspot: 66579:</b><br>54365947–54366518<br><b>NHEK cells DNase I hotspot: 75095:</b><br>54366045–54370999 | <b>025615:</b><br>54366091–54366249<br><b>025610:</b><br>54366634–54366977<br><b>025613:</b><br>54367707–54368584<br><b>TSSs:</b><br><b>CHR12-P0397-R1:</b><br>54366912–54366912<br><b>CHR12-P0397-R2:</b><br>54367584–54367584 |

Exact position of this gene is chr12:54356092-54368740. For easiness, genomic region under analysis is divided into smaller portions. Positions are based on UCSC hg19.

TSS, transcription start site; WE, Weizmann evolutionary.
