# Supplementary material for: HOTAIR Long Non-coding RNA: Characterizing the Locus Features by the In Silico Approaches
Source: PubMed Central journal article supplement — Genomics Inform. 2017 Dec 29;15(4):170–7. doi: 10.5808/GI.2017.15.4.170 (PMC5769859; doi:10.5808/gi.2017.15.4.170), 2017-12-29
Supplement: gi-15-4-170-suppl2.pdf [file gi-15-4-170-suppl2.pdf]

**Supplementary Table 2.** Specific CpG dinucleotides methylation status identified from different cell lines in ENCODE

| Cell line | Position                                   |                                                         |                                                                      |                                                             |                                                             |                                                              |
|-----------|--------------------------------------------|---------------------------------------------------------|----------------------------------------------------------------------|-------------------------------------------------------------|-------------------------------------------------------------|--------------------------------------------------------------|
|           | 54357408–<br>54357772<br>Within<br>CpG1432 | 54359712–<br>54359797<br>Within<br>CpG1433<br>and CpG18 | 54360263–<br>54360837<br>Within<br>CpG1434, CpG25<br>and CpG2.5 (WE) | 54363055–<br>54366424<br>Near to<br>CpG1436 and<br>after it | 54366760–<br>54367822<br>Within<br>CpG1437 and<br>CpG2 (WE) | 54368203–<br>54368640<br>Within<br>CpG165 and<br>CpG2.4 (WE) |
| GM12878   | Unmethylated                               | Mostly unmethylated                                     | Partially methylated                                                 | Different                                                   | Partially* methylated                                       | Different                                                    |
| H1-heSC   | Mostly unmethylated                        | Unmethylated                                            | Unmethylated                                                         | Partially Methylated                                        | Mostly unmethylated                                         | Mostly unmethylated                                          |
| K562      | Unmethylated                               | Mostly unmethylated                                     | Partially <sup>a</sup> methylated                                    | Mostly unmethylated                                         | Different                                                   | Partially <sup>b</sup> methylated                            |
| Hela-S3   | methylated                                 | Methylated                                              | Methylated                                                           | Mostly methylated                                           | Mostly unmethylated                                         | Unmethylated                                                 |
| HepG2     | Different                                  | Partially methylated                                    | Partially methylated                                                 | Different                                                   | Partially methylated                                        | Mostly unmethylated                                          |
| HuVEC     | Unmethylated                               | Unmethylated                                            | Unmethylated                                                         | Partially <sup>c</sup> methylated                           | Mostly unmethylated                                         | Unmethylated                                                 |

Table shows different cell lines (first column) and positions of specific CpG dinucleotides within or near to the predicted CpGIs (first row) in *HOTAIR* gene.

ENCODE, Encyclopedia of DNA Elements; WE, Weizmann evolutionary.

<sup>a</sup>One specific C nucleotide is unmethylated; other specific C nucleotides are partially methylated.

<sup>b</sup>One specific C nucleotide is methylated; other specific C nucleotides are partially methylated.

<sup>c</sup>Two specific C nucleotides are unmethylated; other specific C nucleotides are partially methylated.
