# Supplementary material for: HOTAIR Long Non-coding RNA: Characterizing the Locus Features by the In Silico Approaches
Source: PubMed Central journal article supplement — Genomics Inform. 2017 Dec 29;15(4):170–7. doi: 10.5808/GI.2017.15.4.170 (PMC5769859; doi:10.5808/gi.2017.15.4.170), 2017-12-29
Supplement: gi-15-4-170-suppl3.pdf [file gi-15-4-170-suppl3.pdf]

**Supplementary Table 3.** The motifs sequences identified by MEME and Mast programs in *HOTAIR*

| Motifs | Width | Best possible match (strand -)                  | p-value | Position                                                |
|--------|-------|-------------------------------------------------|---------|---------------------------------------------------------|
| 1      | 47    | GCGAAAAAGGACCAAGAGGGCGAGACGAGGGAAGAGACCTAGAGAGA | 0.00032 | Chr12: 54357805-54357852<br>(within CpG1432)            |
| 2      | 40    | TTTACTCTTTCTTTTCTCTCTTTCTTCCTCTCTTTTTTTT        | 0.00121 | Chr12: 54360742-54360782<br>(within CpG143, CpG2.5(WE)) |
| 3      | 39    | CCCTCTCCCTTTCCTCCCTCTCCCTCCCTCCCTTT             | 0.00048 | Chr12: 54367746-54367785<br>(within CpG1437, CpG165)    |

The motifs sequences are predicted from antisense strand of *HOTAIR* locus and a specified p-value of the motifs are applied by Mast program.  
WE, Weizmann evolutionary.
