# Supplementary material for: HOTAIR Long Non-coding RNA: Characterizing the Locus Features by the In Silico Approaches
Source: PubMed Central journal article supplement — Genomics Inform. 2017 Dec 29;15(4):170–7. doi: 10.5808/GI.2017.15.4.170 (PMC5769859; doi:10.5808/gi.2017.15.4.170), 2017-12-29
Supplement: gi-15-4-170-suppl4.pdf [file gi-15-4-170-suppl4.pdf]

**Supplementary Table 4.** Simple nucleotide polymorphisms in *HOTAIR*

| Name (SNP)  | Function                                | Summary     | Reference allele | Strand | Class     | Position                                                                            |
|-------------|-----------------------------------------|-------------|------------------|--------|-----------|-------------------------------------------------------------------------------------|
| rs1838169   | nc-transcript variant                   | G>C/G       | G                | -      | Single    | Chr12:54357495–54357495 <b>(within CpG 1432 )</b>                                   |
| rs7958904   | nc-transcript variant                   | G>G/C       | C                | +      | Single    | Chr12:54357552–54357552 <b>(within CpG 1432)</b>                                    |
| rs17840857  | nc-transcript variant                   | A/C/G/T     | G                | +      | Single    | Chr12:54357757–54357757 <b>(within CpG 1432)</b>                                    |
| rs111434707 | nc-transcript variant                   | -/G         | G                | +      | Deletion  | Chr12:54357757–54357757 <b>(within CpG 1432)</b>                                    |
| rs200062983 | nc-transcript variant                   | C>C/T       | C                | +      | Single    | Chr12:54357761–54357761 <b>(within CpG 1432)</b>                                    |
| rs35951424  | Intron variant                          | -/A         | A                | +      | Deletion  | Chr12:54357997–54357997<br><b>(within HSMM cells DNase I hotspot:66574)</b>         |
| rs201719283 | Intron variant-<br>Splice donor variant | -/C         | C                | +      | Deletion  | Chr12:54358048–54358014<br><b>(within HSMM cells DNase I hotspot:66574)</b>         |
| rs71227278  | Intron variant<br>nc-transcript variant | ->TTAA      | -                | +      | Insertion | Chr12:54358048–54358047<br><b>(within HSMM cells DNase I hotspot:66574)</b>         |
| rs58072355  | Intron variant                          | A>A/G       | A                | +      | Single    | Chr12:54358443–54358443<br><b>(within DNase I hypersensitivity peak clusters 8)</b> |
| rs139645979 | Intron variant                          | -/ACGCACAAG | ACGCACAAG        | +      | Deletion  | Chr12:54358629–54358629<br><b>(within HSMM cells DNase I hotspot:66574)</b>         |
| rs10783616  | Intron variant                          | C>C/G       | C                | +      | Single    | Chr12:54359220–54359220<br><b>(within active promoter of HSMM cells)</b>            |
| rs10783617  | Intron variant                          | G>G/T       | G                | +      | Single    | Chr12:54359387–54359387<br><b>(within active promoter of HSMM cells)</b>            |
| rs376812530 | Intron variant                          | -/GAAG      | -                | +      | Insertion | Chr12:54359525–54359525<br><b>(within tandem repeat (AAAG)n)</b>                    |
| rs76084431  | Intron variant                          | C>C/T       | C                | +      | Single    | Chr12:54359946–54359946 <b>(within CpG 1433)</b>                                    |
| rs920778    | Intron variant                          | C>C/T       | C                | -      | Single    | Chr12:54360232–54360232<br><b>(within CpG1434 and CpG2.5(WE))</b>                   |
| rs920777    | Intron variant                          | C>C/T       | T                | -      | Single    | Chr12:54360429–54360429<br><b>(within CpG 25, CpG1434 and CpG2.5(WE))</b>           |
| rs74089839  | Intron variant                          | A>A/T       | A                | +      | Single    | Chr12:54360561–54360561<br><b>(within CpG 25, CpG1434 and CpG2.5(WE))</b>           |
| rs11301759  | Intron variant                          | -/C         | C                | +      | Deletion  | Chr12:54360613–54360613<br><b>(within CpG 25, CpG1434 and CpG2.5(WE))</b>           |
| Rsl899663   | Intron variant                          | G>G/T       | G                | -      | Single    | Chr12:54360994–54360994<br><b>(within first active promoter based on Ensembl)</b>   |
| rs4759314   | Intron variant                          | A>A/G       | G                | +      | Single    | Chr12:54361835–54361835<br><b>(within module025607 )</b>                            |
| rs17105613  | Intron variant                          | C>C/T       | T                | +      | Single    | Chr12:54362194–54362194 <b>(within CpG 1435)</b>                                    |
| rs73313155  | nc-transcript variant                   | C>C/T       | C                | +      | Single    | Chr12:54362432–54362432<br><b>(within module025607 )</b>                            |
| rs73313156  | Intron variant                          | G>A/G       | A                | +      | Single    | Chr12:54362915–54362915<br><b>(within module025608)</b>                             |
| rs5798292   | Intron variant                          | -/G         | G                | +      | Deletion  | Chr12:54366274–54366274<br><b>(within 4 strong Enhancers of NHEK cells)</b>         |
| rs12427129  | Intron variant                          | C>C/T       | C                | +      | Single    | Chr12:54367690–54367690<br><b>(within CpG 165 and CpG1437)</b>                      |
| rs74089843  | Intron variant                          | T>A/T       | T                | +      | Single    | Chr12:54368227–54368227 <b>(within CpG 165 )</b>                                    |
| rs78894992  | Intron variant                          | G>A/G       | A                | +      | Single    | Chr12:54368400–54368400<br><b>(within CpG 165 and CpG2.4(WE))</b>                   |
| rs75547142  | Intron variant                          | C>C/T       | C                | +      | Single    | Chr12:54368560–54368560<br><b>(within CpG 165 and CpG2.4(WE))</b>                   |

Simple nucleotide polymorphisms (SNPs) were recognized by “dbSNP 147” and positions are based on UCSC hg19.
